# Supplementary material for: Sensitive Detection of Nucleic Acids Using Subzyme Feedback Cascades
Source: MDPI journal article supplement (doi:10.3390/molecules25071755), 2020-04-10
Supplement: s1 [file s1]

## Appendix A: Oligonucleotide Sequences

Oligonucleotide sequences are listed from 5' to 3'. UPPERCASE bases represent DNA and lowercase bases represent RNA. Underlined bases represent DNazymes and bases in bold represent substrates. /3BioTEG/ represent Biotin functional groups conjugated to a tri-ethylene glycol linker. FAM- indicates the location of a FAM fluorophore, A101- indicates the location of an ATTO Rho101 fluorophore and TRB- indicates the location of a Texas red fluorophore. -FQ represents the location of an Iowa Black quencher capable of absorbing fluorescence in the range of 420 – 620 nm and -RQ represents the location of an Iowa Black quencher used for absorbing fluorescence in the range of 500 – 700 nm. iFluorT indicates the location of an internal fluorescein attached to position 5 of the thymine ring and ZEN represents an internal ZEN quencher. -3P indicates a 3' phosphate group used to inhibit degradation by exonucleases and to block extension by DNA polymerases.

| ID             | Oligonucleotide Sequence                                                                                                                  |
|----------------|-------------------------------------------------------------------------------------------------------------------------------------------|
| Subzyme 1      | <u>CATGAGTGATTCCGAGCCGGTCGAAACTTCTCTACAT</u> /iFluorT/CAC-<br><b>GCCTCguCTCCTCCC</b> /ZEN//ZEN/TTTTTTTT/3BioTEG/                          |
| Subzyme 2      | <u>GGAGGAGAGGCTAGCTACAACGAGAGGCGTG</u> /iFluorT/ <b>GTAGA-</b><br><b>GAAGTaGATCACTCATG</b> /ZEN//ZEN/TTTTTTTT/3BioTEG/                    |
| Subzyme 3      | <u>TCACTCTAGTCTCCGAGCCGGTCGAAATGCTAACGATAGTGTTCAC-</u><br><b>GCCTCguCTCCTCCCTTTTT</b> GACTAGAGTGTTTTTT/3BioTEG/                           |
| Subzyme 4      | <u>GGAGGAGAGGCTAGCTACAACGA-</u><br><u>GAGGCGTGTTTTT</u> /iFluorT/ <b>ATCGTTAGCATgGGACTAGAG-</b><br><b>TGA</b> /ZEN//ZEN/TTTTTTTT/3BioTEG/ |
| Dz1            | <u>GGGAGGAGAGGCTAGCTACAACGAGAGGCGTG</u>                                                                                                   |
| AF-TFRC        | AGTCTGTTTTCCAGTCAGAGGGACAGTCTCCTTCCATATTCC                                                                                                |
| AF-ompA        | CTTGCGATCCTTGCACCACTTGGTGTGACGCTATCAGCATGCG-<br>TATGGGTTACTAT                                                                             |
| AF-OXA         | ATTCCAGAGCACAACACTACGCCGTGTGATTTATGTTTCAGTAAAGTG                                                                                          |
| AF-Bla-KPC     | CCGGTTTTGTCTCCGACTGCCAGTCTGCCGGCACCG                                                                                                      |
| Substrate 1-FQ | <b>TRB-TTGTAGAGAAGTaGATCACTCATG-RQ</b>                                                                                                    |
| Substrate 2-FQ | <b>A101-ATCGTTAGCATgGGACTAGAGTGA-RQ</b>                                                                                                   |
| Substrate 3-FQ | <b>A101-ATCACGCCTCguCTCCTCCCAG-RQ</b>                                                                                                     |
| Substrate 4-FQ | <b>FAM-ATCGTTAGCATgGGACTAGAGTGA-FQ</b>                                                                                                    |
| Substrate 5-FQ | <b>FAM-ATCACGCCTCguCTCCTCCCAG-FQ</b>                                                                                                      |
| PzA-TFRC       | GGAATATGGAAGGAGACTGTCACAACGAGAGGCGTGAT-3P                                                                                                 |
| PzB-TFRC       | CTGGGAGGAGAGGCTAGCTCCTCTGACTGGAAAACAGACT-3P                                                                                               |
| PzA-ompA       | CCCATACGCATGCTGATAGCACAACGAGAGGCGTGA-3P                                                                                                   |
| PzB-ompA       | GGGAGGAGAGGCTAGCTGTCACACCAAGTGGTGCAAG-3P                                                                                                  |
| PzA-OXA        | CACTTTACTGAACATAAATCACAGACAACGAGAGGCGTGAT-3P                                                                                              |
| PzB-OXA        | CTGGGAGGAGAGGCTAGCTGGCGTAGTTGTGCTCTGGAAT-3P                                                                                               |
| PzA-Bla-KPC    | CCGTGCCCGCAGACTGGGACAACGAGAGGCGTG-3P                                                                                                      |
| PzB-Bla-KPC    | GGAGGAGAGGCTAGCTCAGTCGGAGACAAAACCGG-3P                                                                                                    |

## **Appendix B: Tissue culture of *Chlamydia trachomatis* and extraction of Total Nucleic Acid (TNA)**

*Chlamydia trachomatis* (serovar D) TNA samples were obtained in vitro, using standard tissue culture techniques as described below. The human epithelial cell line (HEp-2) (ATCC® CCL-23™, Manassas VA, USA) were grown in Dulbecco's Modified Eagle medium (DMEM) (Sigma Aldrich, St. Louis, MO, USA) supplemented with 10% heat-inactivated Fetal Bovine Serum (FBS) (Sigma Aldrich, St. Louis, MO, USA), 100 mg/mL Streptomycin (Gibco®, Invitrogen Corporation, Thermo Fisher Scientific, Waltham, MA, USA), 50 mg/mL Gentamicin (Gibco® by Life Technologies, Thermo Fisher Scientific, Waltham, MA, USA) and 20 mM Glutamine (Sigma Aldrich, St. Louis, MO, USA), incubated at 37 °C with 5% CO<sub>2</sub>. *Chlamydia trachomatis* was inoculated on a HEp-2 monolayer, present on a T75 flask (Nunc™, Thermo Fisher Scientific, Waltham, MA, USA) with a Multiplicity of Infection (MOI) of 1. The infection was completed by centrifugation-assisted inoculation at 500 g for 30 minutes at a temperature of 28 °C and subsequently incubated. At 4 hours post-infection (PI), DMEM was replaced with addition of 1mg/mL of Cycloheximide (Sigma Aldrich, St. Louis, MO, USA) and again incubated at 37 °C with 5% CO<sub>2</sub> until harvested. At an exponential growth phase, 24 hours PI, cells were manually harvested using a cell scraper and sucrosephosphate-glutamate (SPG) buffer (250mM sucrose, 10nM sodium phosphate and 5mM L-glutamate). Harvested material was stored for further processing at -80 °C. Total nucleic acid samples (TNA) were extracted using the QIAamp MinElute Virus Spin Kit (QIAGEN, Hilden, Germany) following the standard protocol.
